# Supplementary material for: Polyacryloyl hydrazide based injectable & stimuli responsive hydrogels with tunable properties
Source: Royal Society of Chemistry journal article supplement (doi:10.1039/c4tb01257g), 2014-01-01
Supplement: c4tb01257g1.pdf [file c4tb01257g1.pdf]

## Supporting Information

For

### Polyacryloyl Hydrazide Based Injectable & Stimuli Responsive Hydrogels with Tunable Properties

*Anuj Kumar<sup>†</sup>, Sabindra K. Samal<sup>‡</sup>, Rupesh Dash<sup>‡</sup> & Umapasana Ojha<sup>\*,†</sup>*

<sup>†</sup>Department of Chemistry, Rajiv Gandhi Institute of Petroleum Technology Raebareli, Ratapur

Chowk, UP-229316, India

<sup>‡</sup>Institute of Life Science, Bhubaneswar, Odisha, India

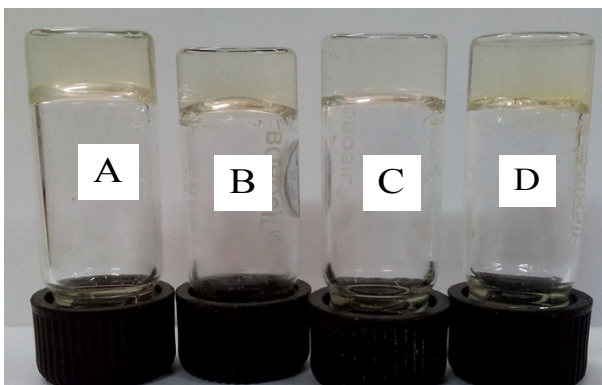

**Figure S1:** Photographs of (A) PAH-DTDA, (B) PAH-DEM, (C) PAH-AA and (D) PAH-PEGDA hydrogels.

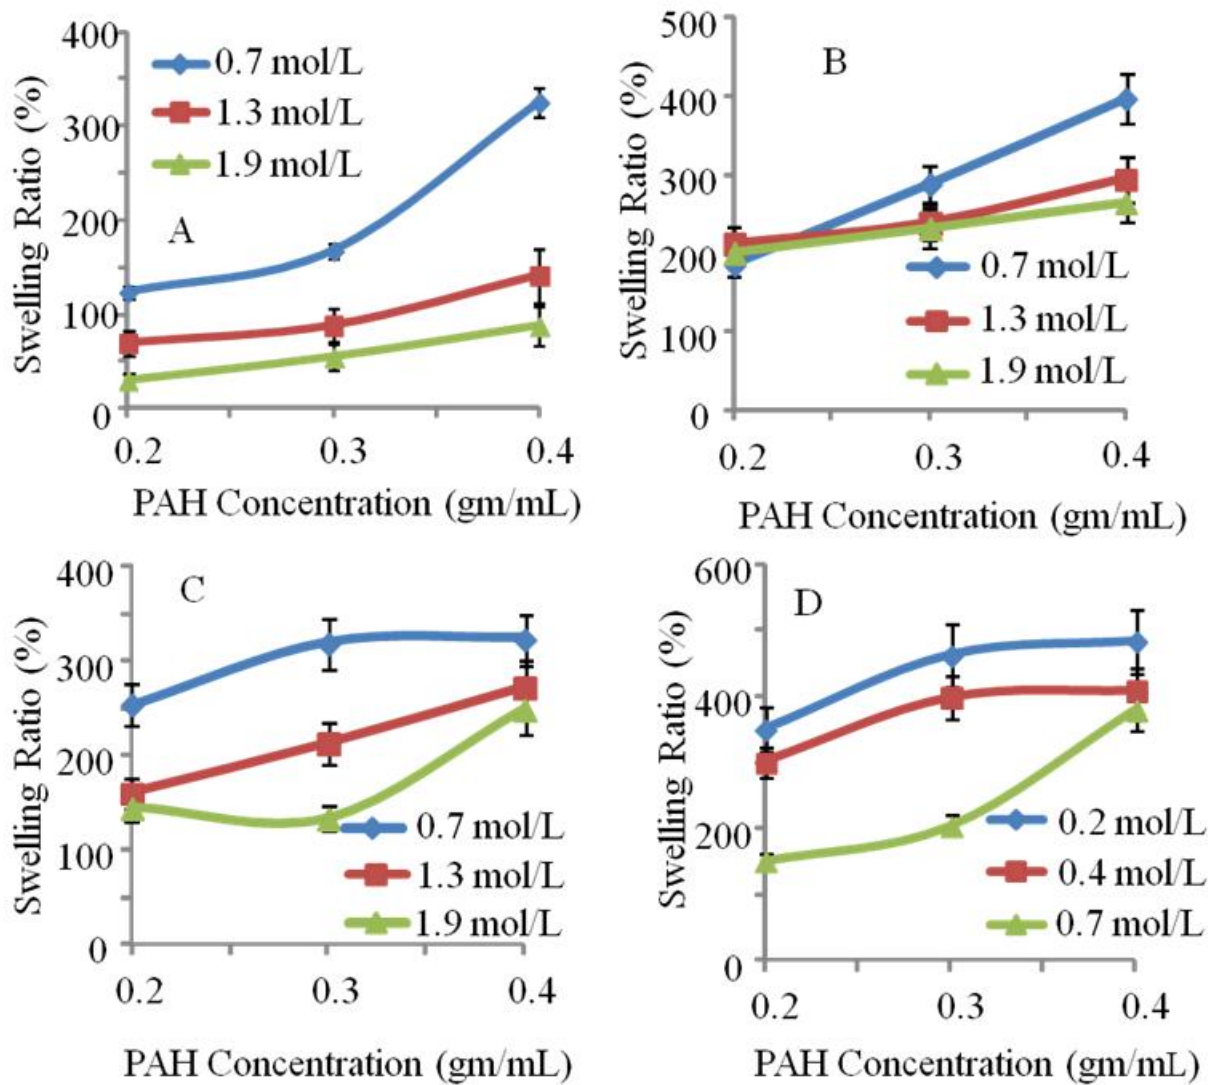

**Figure S2:** Swelling ratios at fixed temperature (~25 °C) and different (A) DTDA (B) DEM (C) AA or (D) PEGDA concentrations.

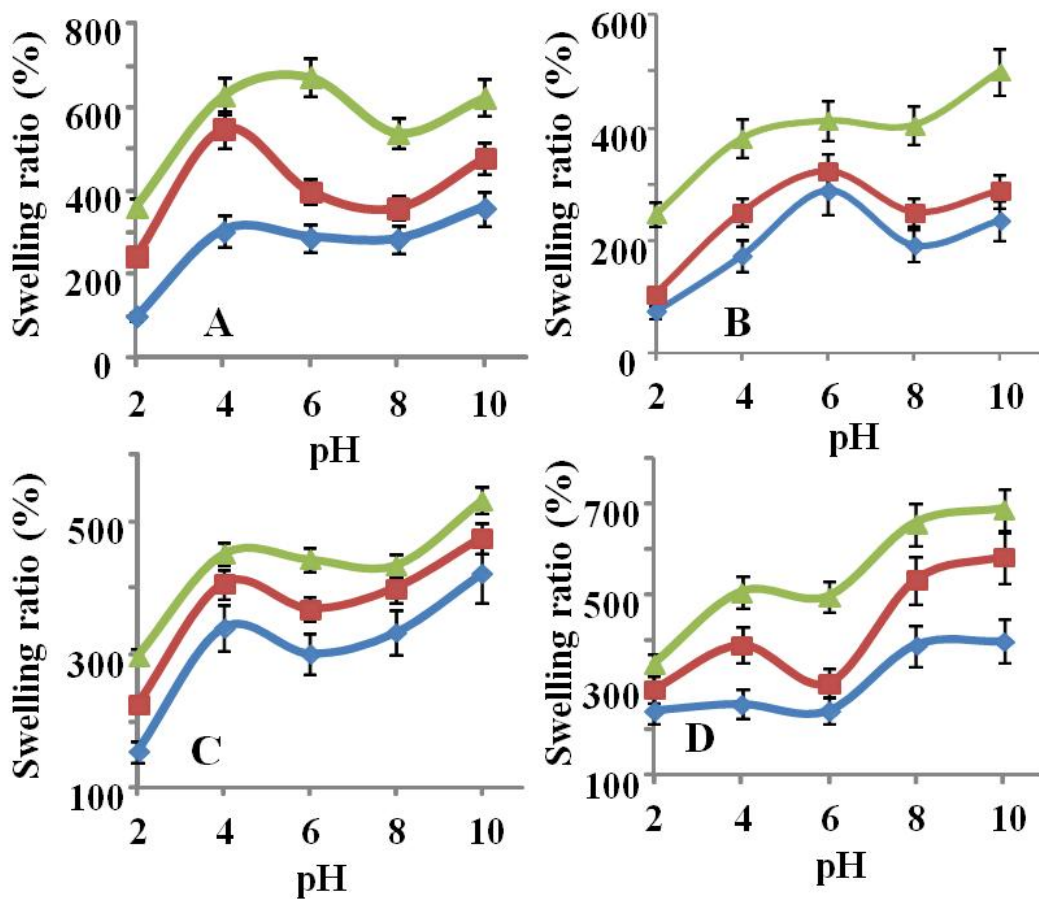

**Figure S3:** Swelling ratio of the hydrogels synthesized using 0.2 gm/mL of PAH (◆), 0.3 gm/mL of PAH (■) and 0.4 gm/mL of PAH (▲) and (A) 0.7 mol/L of DTDA (B) 0.7 mol/L of DEM (C) 0.7 mol/L of AA or (D) 0.7 mol/L of PEGDA measured at ~ 25 °C

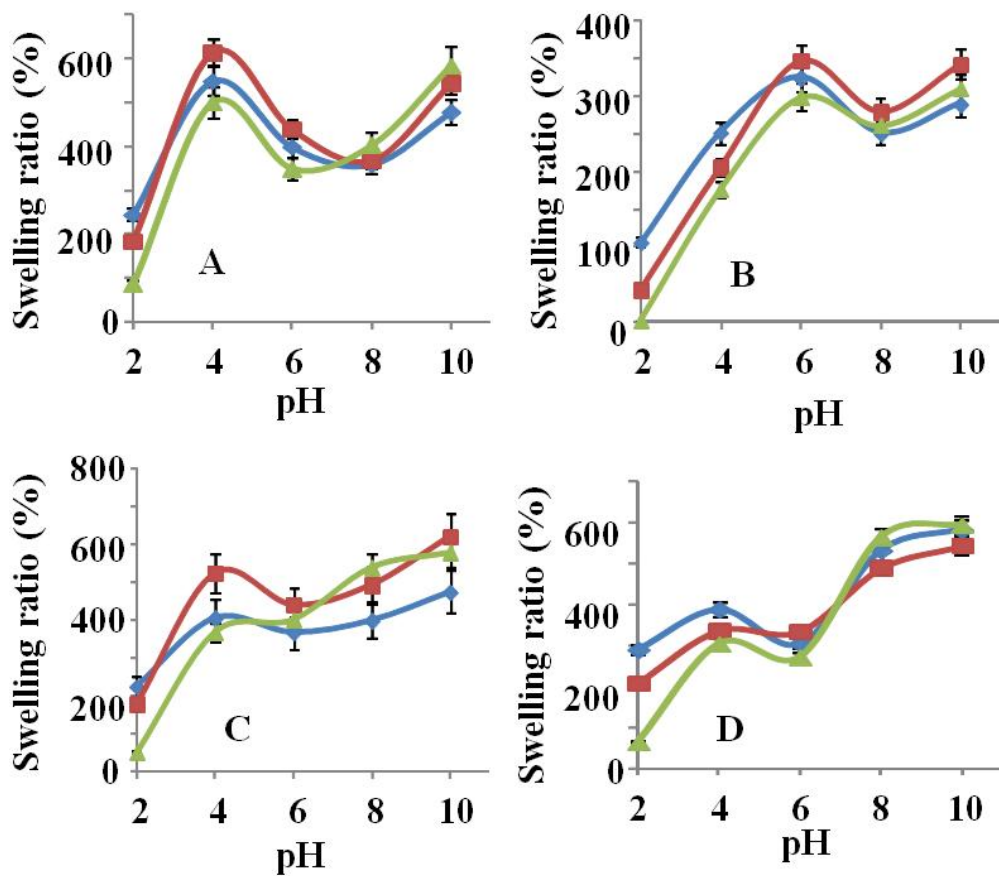

**Figure S4:** Swelling ratio of the hydrogels synthesized using 0.3 gm/mL of PAH and (A) 0.7 mol/L of DTDA, (B) 0.7 mol/L of DEM (C) 0.7 mol/L of AA or (D) 0.7 mol/L of PEGDA measured at ~ 25 (◆), 37 (■) and 65 (⊕) °C.

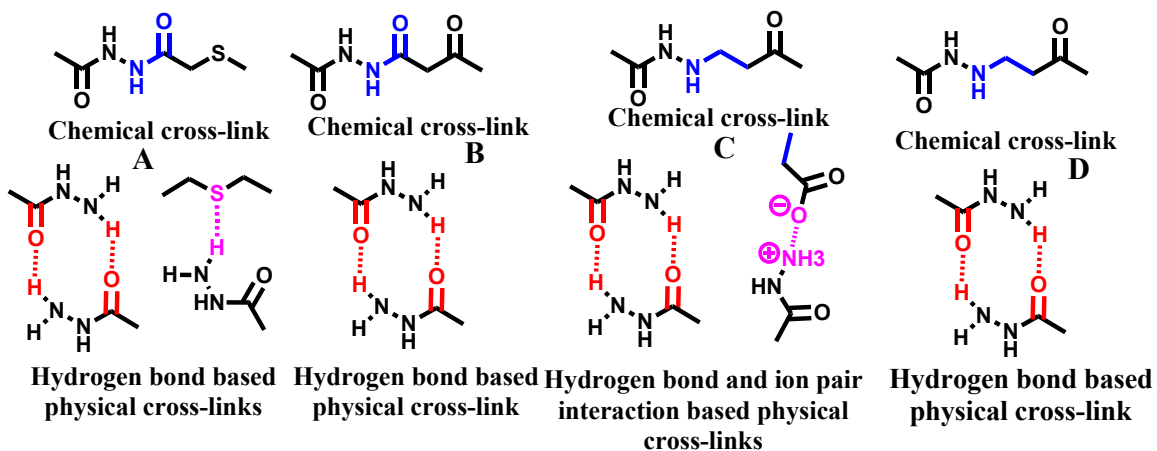

**Figure S5:** Schematics showing the type of physical and chemical crosslinking units present in the PAH and (A) DTDA, (B) DEM, (C) AA or (D) PEGDA based hydrogels.

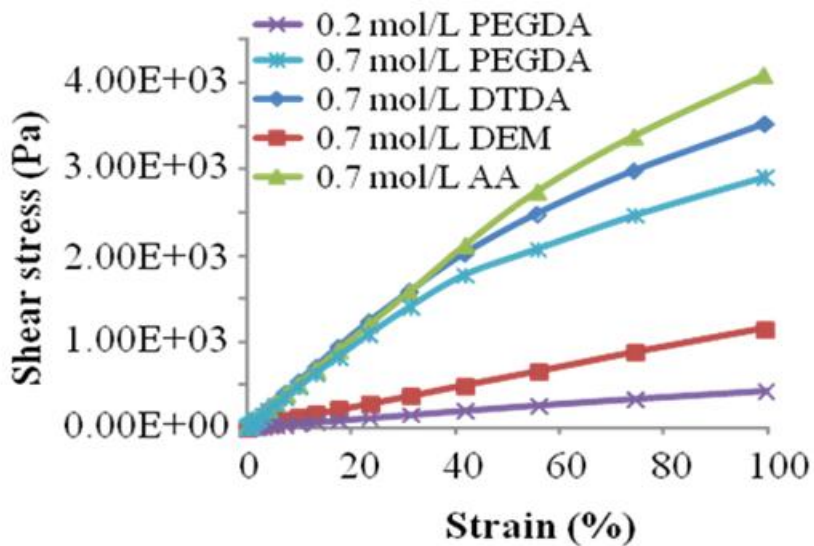

**Figure S6:** Shear stress versus strain plot of hydrogels recorded at 10 rad/sec angular frequency.

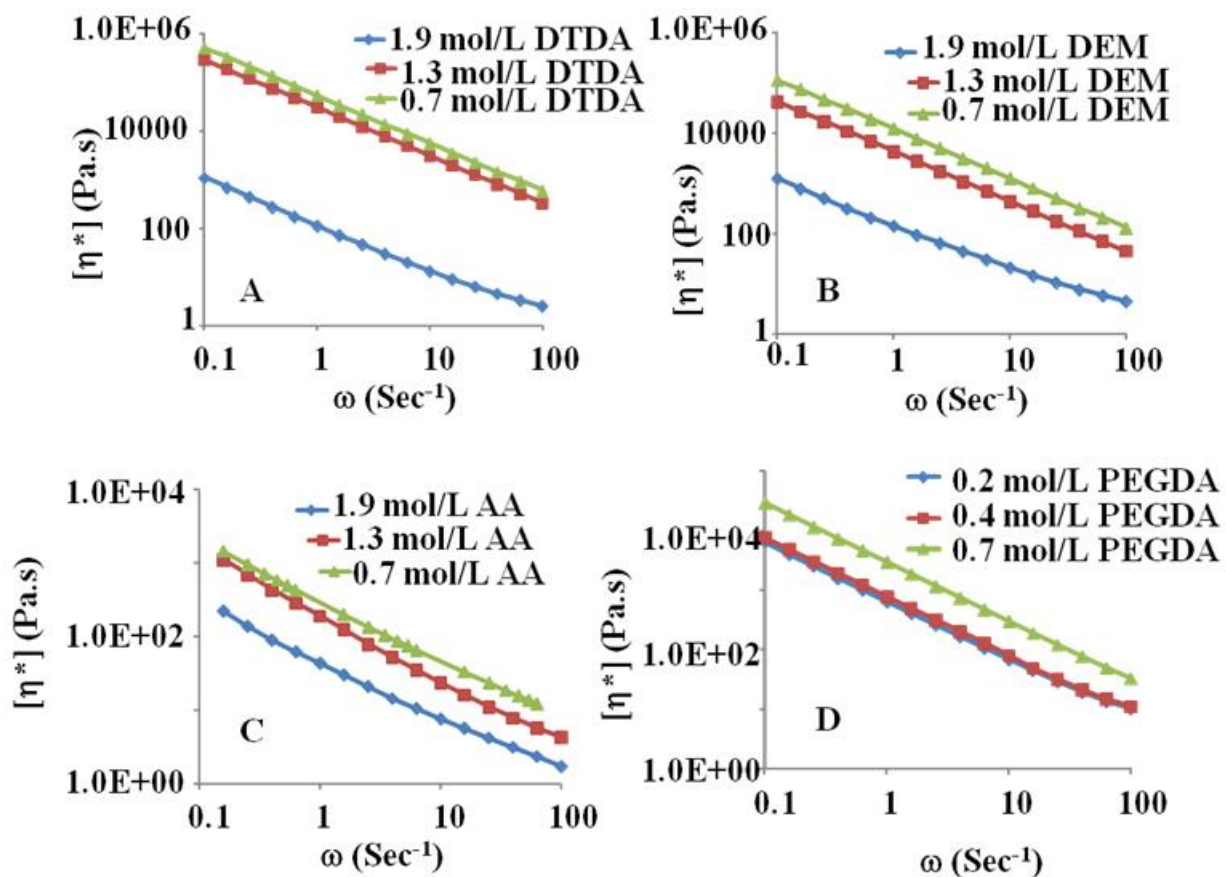

**Figure S7:** Frequency versus complex viscosity plot of PAH based hydrogels synthesized using 0.3 gm/mL PAH and (A) DTDA, (B) DEM, (C) AA or (D) PEGDA as cross-linker

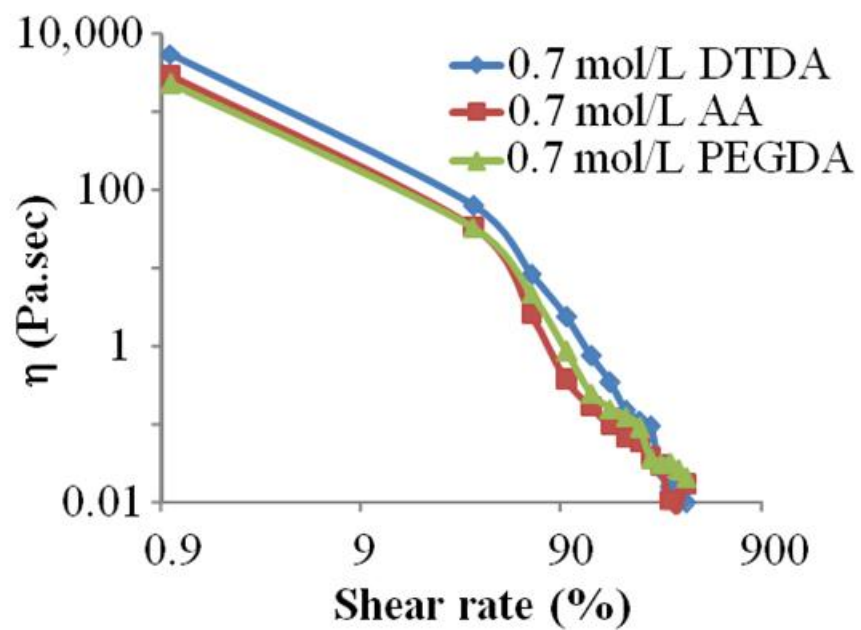

**Figure S8:** Viscosity versus shear rate plot of various hydrogels synthesized using 0.3 gm/mL PAH

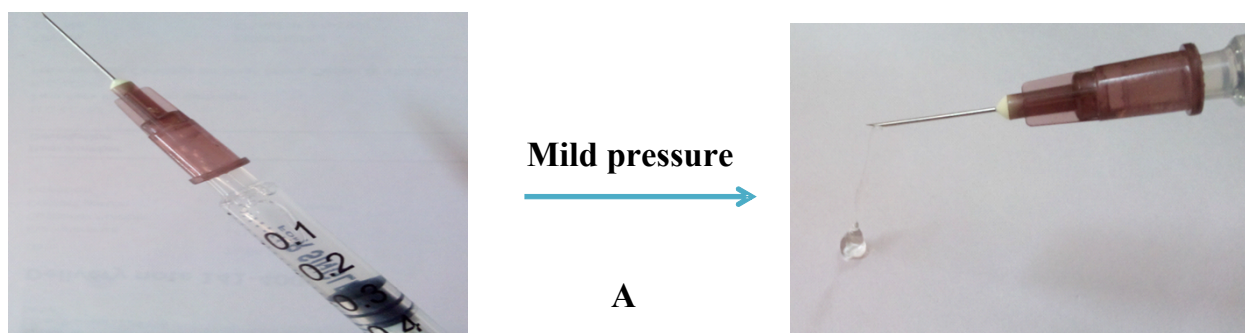

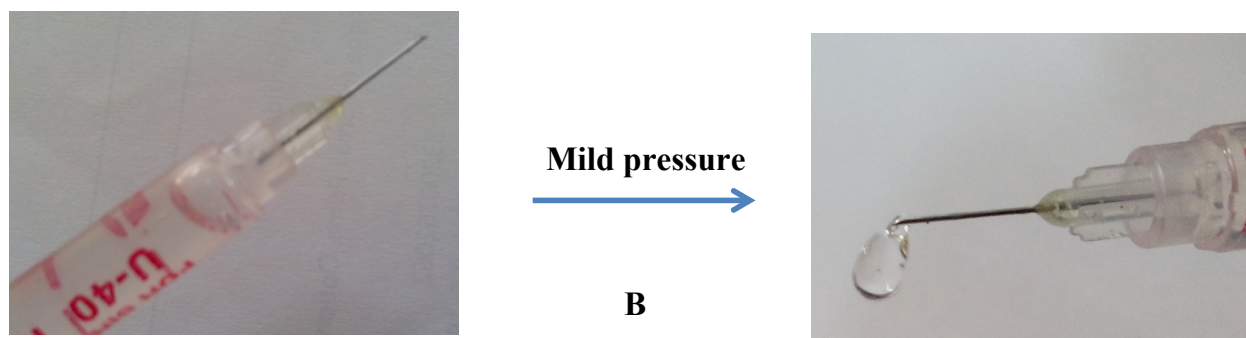

**Figure S9:** Photographs depicting the injectability of the PAH (0.2 gm/mL)-AA (0.4 mol/L) hydrogel by (A) 26 and (B) 30 gauge size needle.

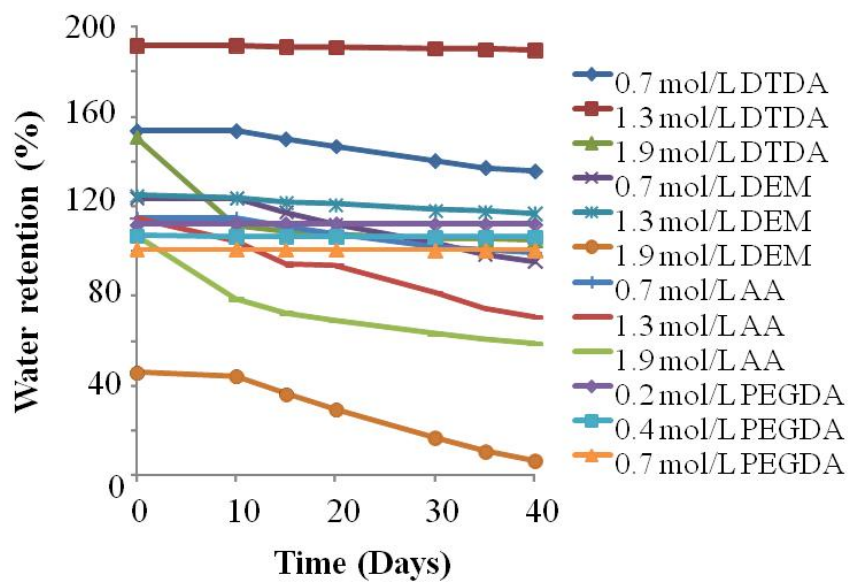

**Figure S10:** Water retention capacities of PAH based hydrogels prepared using various cross-linkers.



**Table S1:** In-situ percentage encapsulation of Rhodamine B in PAH based hydrogels synthesized using various cross-linkers.

| Concentration of cross linker | PAH-DTDA (%) | PAH-DEM (%) | PAH-AA (%) | Concentration of cross linker | PAH-PEGDA (%) |
|-------------------------------|--------------|-------------|------------|-------------------------------|---------------|
| 1.9 mol/L                     | 97.4         | 96.7        | 99.1       | 0.7 mol/L                     | 96.6          |
| 1.3 mol/L                     | 96.9         | 97.9        | 98.0       | 0.4 mol/L                     | 96.7          |
| 0.7 mol/L                     | 99.2         | 98.7        | 98.5       | 0.2 mol/L                     | 98.6          |

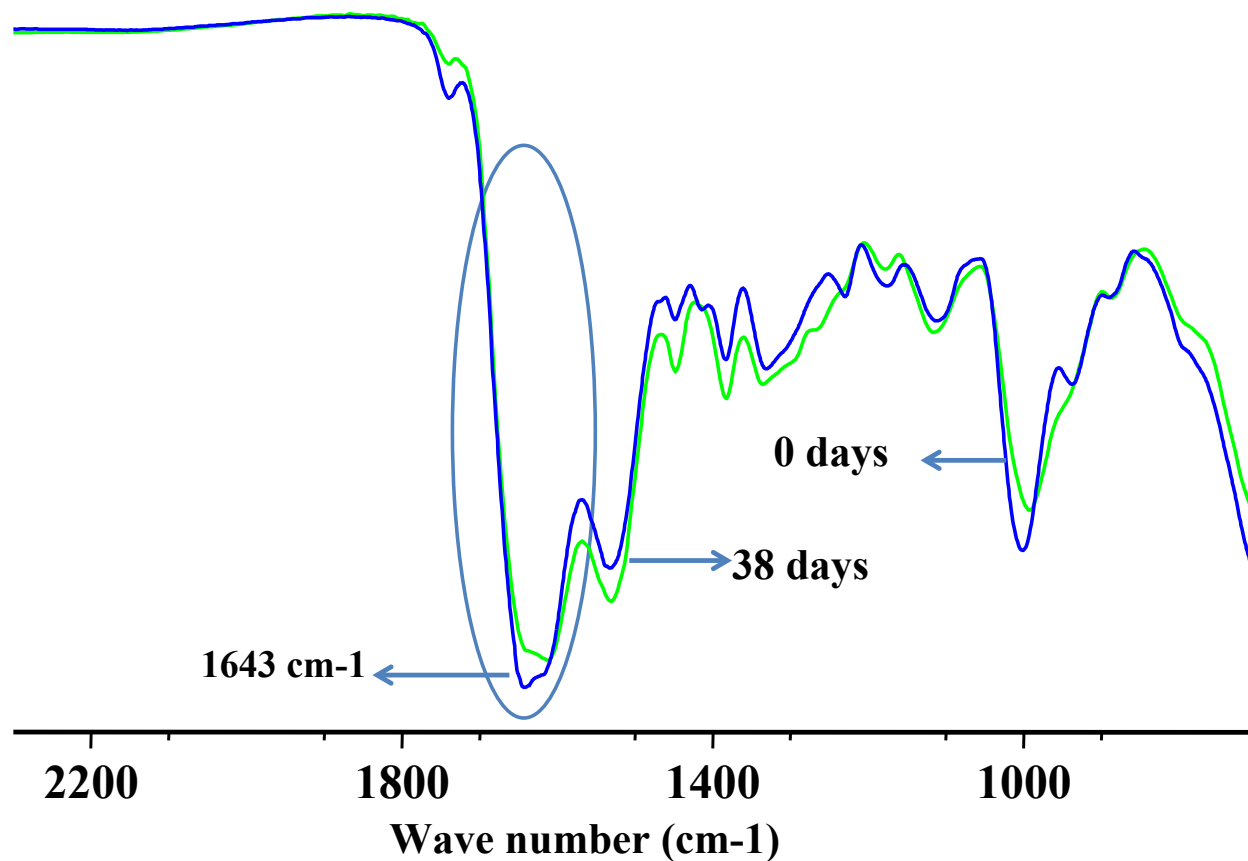

**Figure S11:** ATR FT-IR spectra of the as synthesized (blue line) DTDA (0.7 mol/L) based hydrogel and the gel after 38 days (green line)

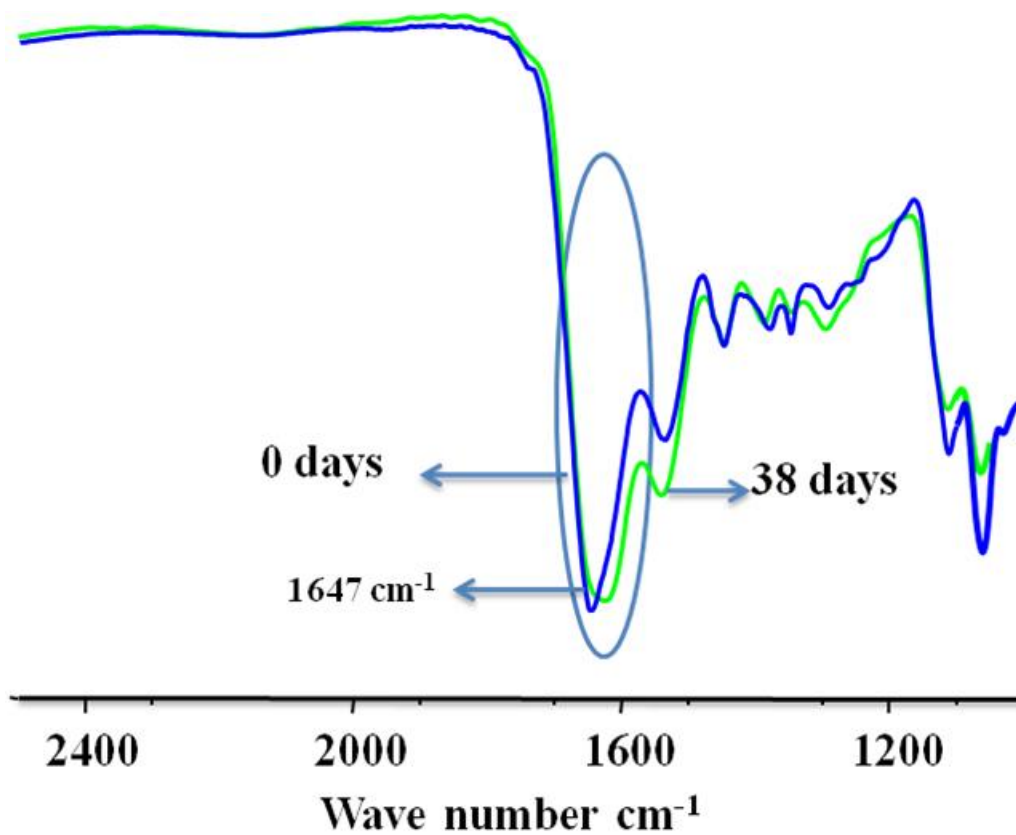

**Figure S12:** ATR FT-IR spectra of the as synthesized (blue line) PEGDA (0.7 mol/L) based hydrogel and the gel after 38 days (green line)
